# Supplementary material for: Measurement report: Particle-size-dependent fluorescence properties of water-soluble organic compounds (WSOCs) and their atmospheric implications for the aging of WSOCs
Source: Copernicus journal article supplement (doi:10.5194/acp-22-465-2022), 2022-01-13
Supplement: Supplementary file 2 [file acp-22-465-2022-supplement.zip]

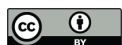

## *Supplement of*

# **Measurement report: Particle-size-dependent fluorescence properties of water-soluble organic compounds (WSOCs) and their atmospheric implications for the aging of WSOCs**

**Juanjuan Qin et al.**

*Correspondence to:* Jihua Tan (tanjh@ucas.ac.cn) and Kang Xiao (kxiao@ucas.ac.cn)

- [acp-22-465-2022-supplement-title-page.pdf](#)
- [Supplement - Data.xlsx](#)
- [Supplement.pdf](#)

The copyright of individual parts of the supplement might differ from the article licence.
